# Supplementary material for: Diameter-optimized PVA@PPy nanofibers: MXene interlayer space expansion without sacrificing electron transport
Source: Royal Society of Chemistry journal article supplement (doi:10.1039/d2tc00231k), 2022-01-01
Supplement: d2tc00231k1.pdf [file d2tc00231k1.pdf]

## Supporting Information

### Diameter-optimized PVA@PPy nanofibers: MXene interlayer space expansion without sacrificing electron transport

Jinli Li<sup>a</sup>, Zhiqian Cao<sup>b</sup>, Haibo Hu<sup>b</sup> and Derek Ho<sup>a, c\*</sup>

<sup>a</sup> Department of Materials Science and Engineering, City University of Hong Kong, Kowloon, Hong Kong, China.

<sup>b</sup> School of Materials Science and Engineering, Key Laboratory of Structure and Functional Regulation of Hybrid Materials, Ministry of education, Anhui University, Hefei, China

<sup>c</sup> Hong Kong Center for Cerebro-Cardiovascular Health Engineering, Hong Kong, China

E-mail: derekho@cityu.edu.hk

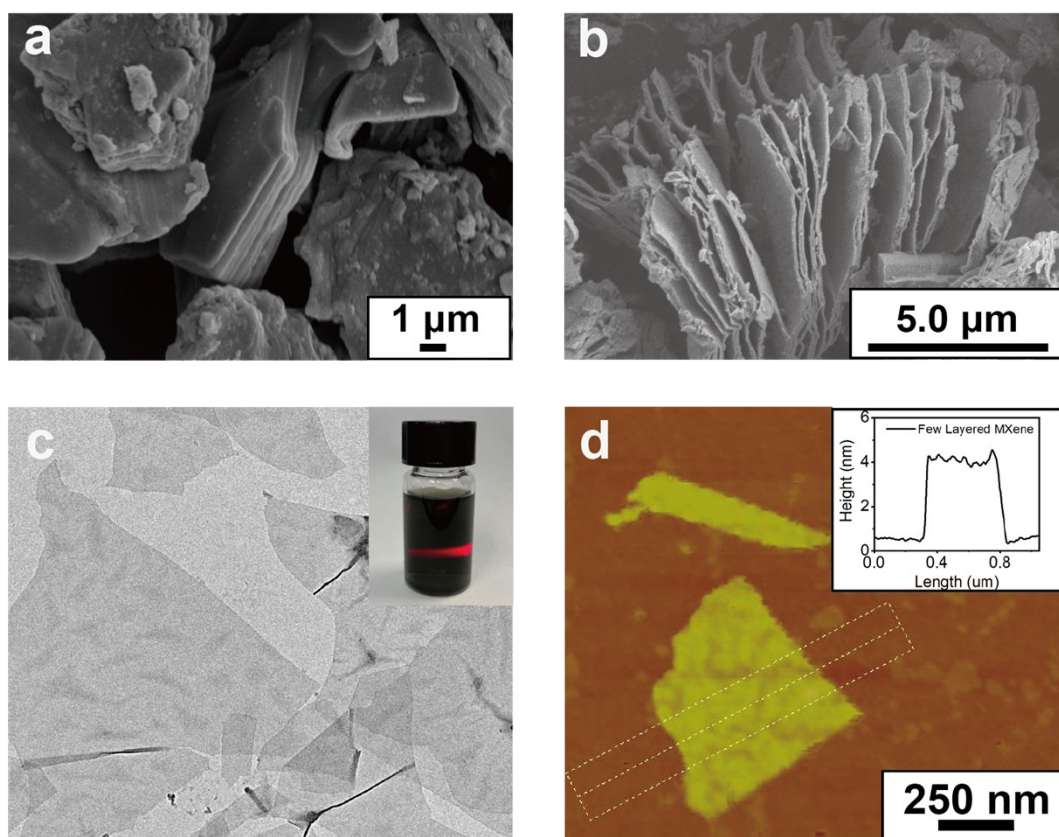

Figure S1. SEM of (a)  $Ti_3AlC_2$  MAX phase precursor (b) etched multi-layered MXene (c) TEM image of few-layered MXene sheet and (d) corresponding AFM image.

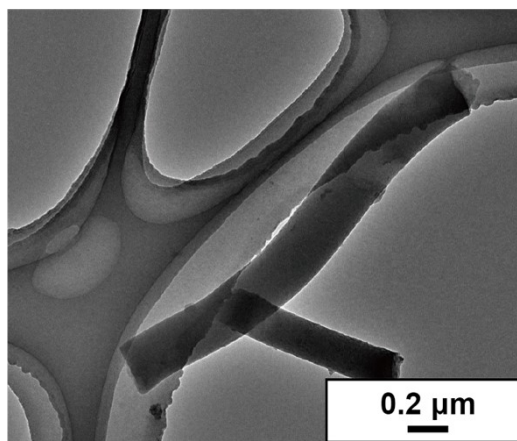

Figure S2. SEM image of annealed PVA nanofibers before coated using PPy.

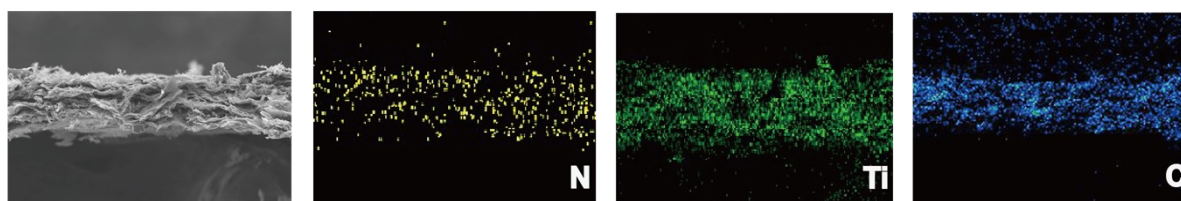

Figure S3. SEM and elemental mappings of N, Ti, and C within the MXene/PVA@PPy-L hybrid film.

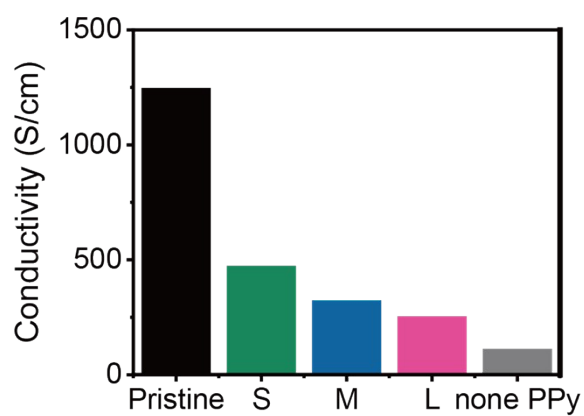

Figure S4. Electrical conductivity of pristine MXene thin-film and MXene/PVA@PPy hybrid films of different diameters – small (S), medium (M), and large (L) and MXene/PVA hybrid film.

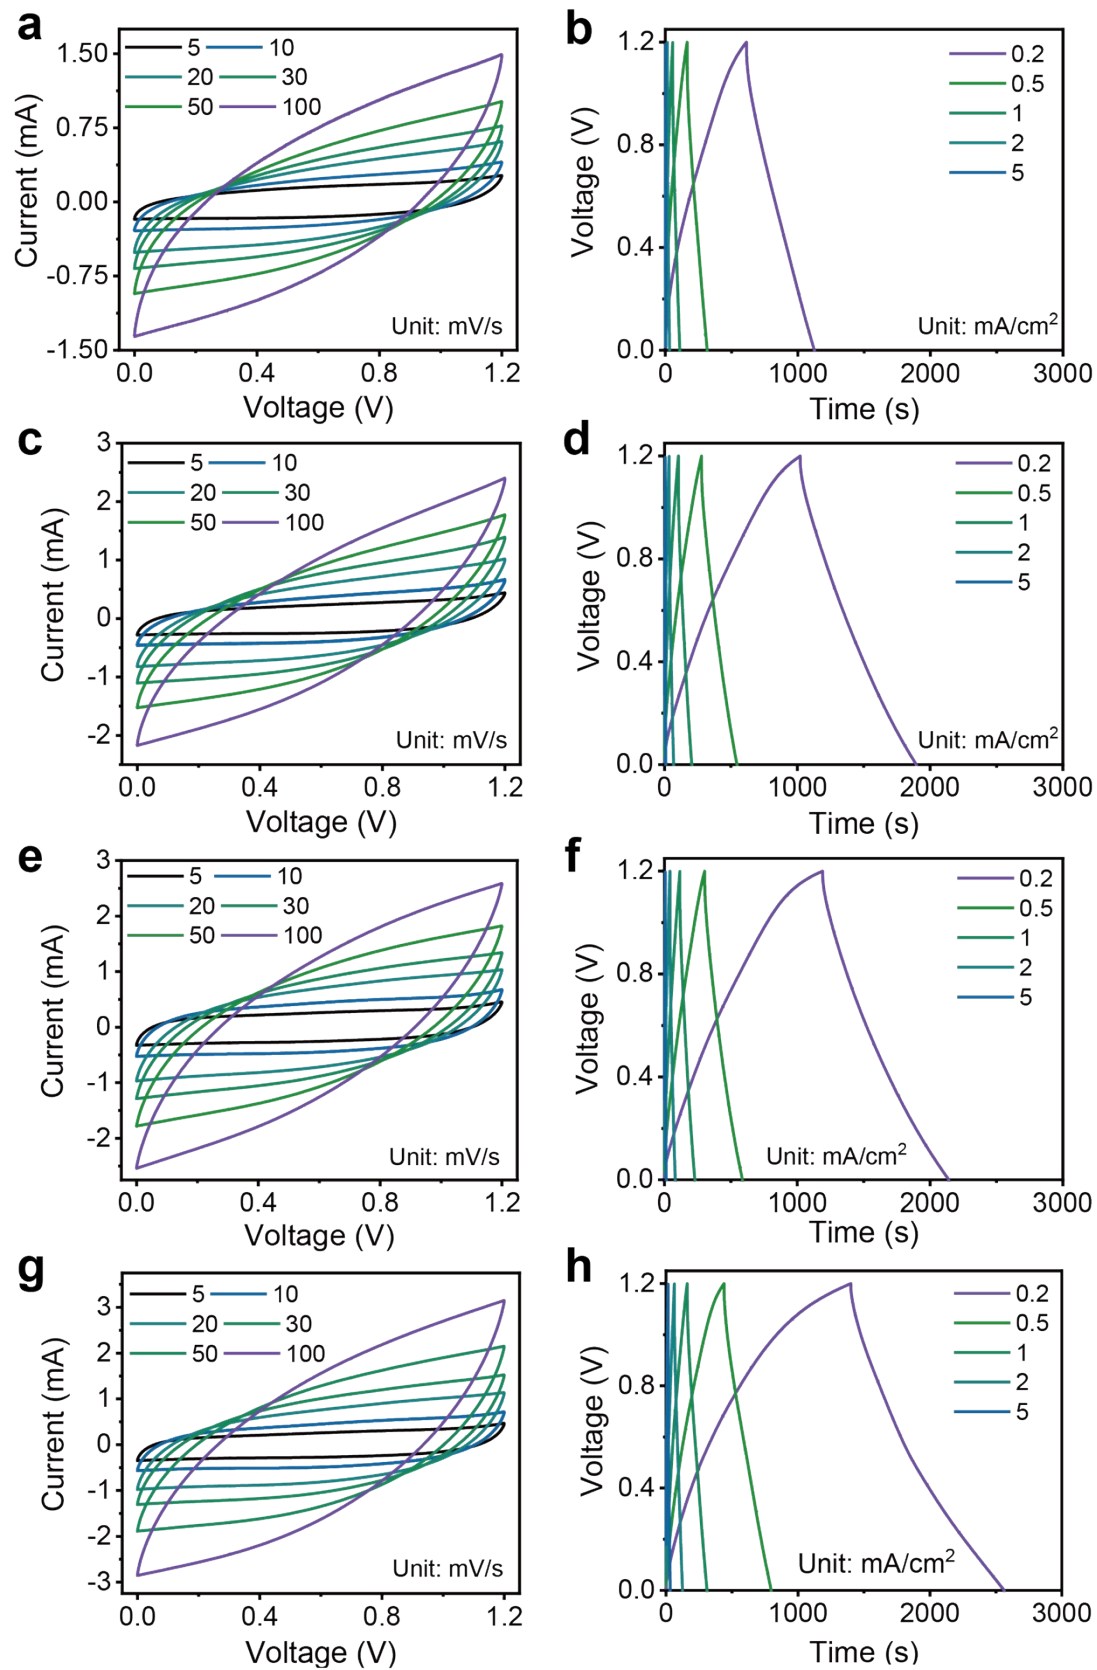

Figure S5. CV profiles of the micro-supercapacitor units employing (a) pristine MXene film, (c) MXene/PVA/PPy-S, (e) MXene/PVA@PPy-M and (g) MXene/PVA@PPy-L across various scanning rates, and (b,d,f,h) the corresponding GCD profiles.

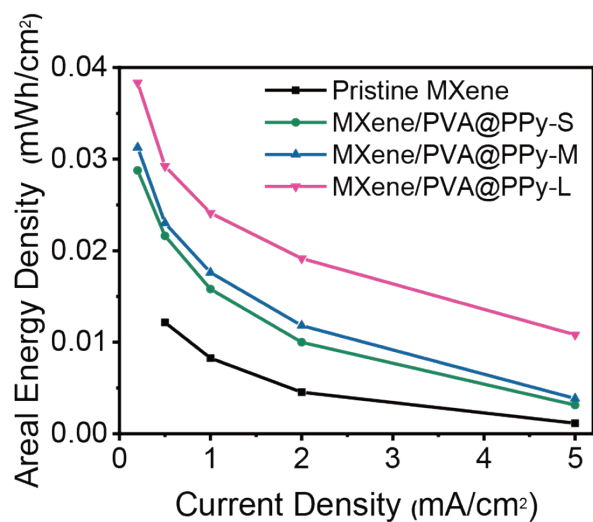

Figure S6. Areal energy density of the as-fabricated ZMSCs based on pristine MXene film and MXene/PVA@PPy hybrid film electrodes employing PVA@PPy nanofibers with three different diameters.

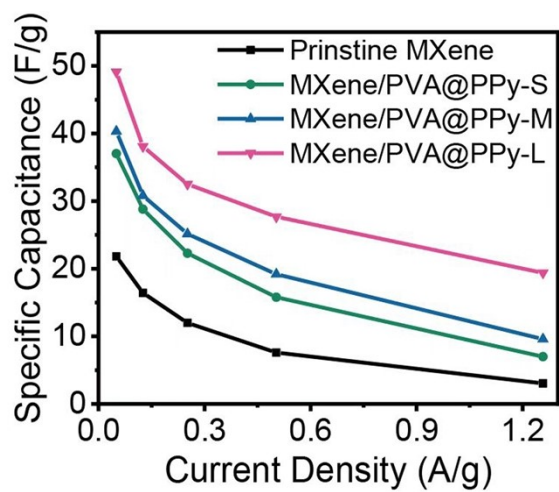

Figure S7. Specific capacitance of the as-fabricated ZMSCs based on pristine MXene film and MXene/PVA@PPy hybrid film electrodes employing PVA@PPy nanofibers with three different diameters versus current densities.

**Table S1** Performance of recently reported advanced MXene based symmetrical and asymmetrical micro-supercapacitors.

| Electrodes                    | Electrolyte                                               | Voltage Windows[V] | Areal Capacitance [mF/cm <sup>2</sup> ] | Areal Energy Density [μWh/cm <sup>2</sup> ] | Areal Power Density [mW/cm <sup>2</sup> ] | Ref.             |
|-------------------------------|-----------------------------------------------------------|--------------------|-----------------------------------------|---------------------------------------------|-------------------------------------------|------------------|
| <b>Symmetrical</b>            |                                                           |                    |                                         |                                             |                                           |                  |
| <b>MXene/PVA@PPy</b>          | 1M Zn(CF <sub>3</sub> SO <sub>3</sub> ) <sub>2</sub> /PAM | 0-1.2              | 195                                     | Max: 38.4<br>Min:10.8                       | Max:2.51<br>Min:0.119                     | <b>This work</b> |
| <b>Be<sup>2+</sup>-MXene</b>  | Gelatin/ZnSO <sub>4</sub>                                 | 0-0.6              | 77.2                                    | 3.86                                        | 0.12                                      | 1                |
| <b>MXene-Mg<sup>2+</sup></b>  | 3M H <sub>2</sub> SO <sub>4</sub> /PVA                    | 0-0.6              | 409                                     | Max:21.6<br>Min:7.4                         | Max:1.1<br>Min:0.1                        | 2                |
| <b>MXene/BC@PPy</b>           | 1M H <sub>2</sub> SO <sub>4</sub> /PVA                    | 0-0.6              | 200                                     | 10                                          | ---                                       | 3                |
| <b>MXene/BCF</b>              | 1M Zn(CF <sub>3</sub> SO <sub>3</sub> ) <sub>2</sub> /PAM | 0-1.2              | 179                                     | 34                                          | ---                                       | 4                |
| <b>MXene/BC</b>               | 1M H <sub>2</sub> SO <sub>4</sub> /PVA                    | 0-0.6              | 112                                     | 5.54                                        | 0.114                                     | 5                |
| <b>MXene/MPFs</b>             | 1M H <sub>2</sub> SO <sub>4</sub> /PVA                    | 0-0.6              | 408                                     | 20.4                                        | 0.15                                      | 6                |
| <b>MXene</b>                  | 3M H <sub>2</sub> SO <sub>4</sub> /PVA                    | 0-0.6              | 61.7                                    | 0.76                                        | 0.33                                      | 7                |
| <b>Screen-printed MXene</b>   | 3M H <sub>2</sub> SO <sub>4</sub> /PVA                    | 0-0.6              | 158                                     | 40.5                                        | 0.26                                      | 8                |
| <b>MXene</b>                  | H <sub>2</sub> SO <sub>4</sub> /PVA                       | 0-0.5              | 43                                      | 0.32                                        | 0.158                                     | 9                |
| <b>Asymmetrical</b>           |                                                           |                    |                                         |                                             |                                           |                  |
| <b>CNT@PPy//MXene</b>         | 3M H <sub>2</sub> SO <sub>4</sub> /PVA                    | 0-1.4              | 150                                     | 40.5                                        | ---                                       | 10               |
| <b>MXene//Co-Al-LDH</b>       | PVA/KOH                                                   | 0.4-1.45           | 40                                      | 8.84                                        | 0.23                                      | 11               |
| <b>RuO<sub>2</sub>//MXene</b> | 1M H <sub>2</sub> SO <sub>4</sub> /PVA                    | 0-1.5              | 60                                      | 19                                          | 1.5                                       | 12               |
| <b>MXene/AC</b>               | Na <sub>2</sub> SO <sub>4</sub> /PVA                      | 0-1.6              | 7.8                                     | 3.5/mWh/cm <sup>3</sup>                     | 100/mW/cm <sup>3</sup>                    | 13               |
| <b>ZIF-C//NiCoP@NiOOH</b>     | PVA/KOH                                                   | 0-1.4              | 54.7                                    | 13.9                                        | 0.27                                      | 14               |

## Reference

1. Li, S.; Shi, Q.; Li, Y.; Yang, J.; Chang, T.-H.; Jiang, J.; Chen, P.-Y. *Advanced Functional Materials* **2020**, *30*, (40), 2003721.
2. Ding, M.; Li, S.; Guo, L.; Jing, L.; Gao, S.-P.; Yang, H.; Little, J. M.; Dissanayake, T. U.; Li, K.; Yang, J.; Guo, Y.-X.; Yang, H. Y.; Woehl, T. J.; Chen, P.-Y. *Advanced Energy Materials* **2021**, *11*, (35), 2101494.
3. Wu, Y.; Hu, H.; Yuan, C.; Song, J.; Wu, M. *Nano Energy* **2020**, *74*, 104812.
4. Cao, Z.; Fu, J.; Wu, M.; Hua, T.; Hu, H. *Energy Storage Materials* **2021**, *40*, 10-21.
5. Jiao, S.; Zhou, A.; Wu, M.; Hu, H. *Advanced Science* **2019**, *6*, (12), 1900529.
6. Zhao, W.; Peng, J.; Wang, W.; Jin, B.; Chen, T.; Liu, S.; Zhao, Q.; Huang, W. *Small* **2019**, *15*, (18), 1901351.
7. Zhang, C.; Kremer, M. P.; Seral-Ascaso, A.; Park, S.-H.; McEvoy, N.; Anasori, B.; Gogotsi, Y.; Nicolosi, V. *Advanced Functional Materials* **2018**, *28*, (9), 1705506.
8. Abdolhosseinzadeh, S.; Schneider, R.; Verma, A.; Heier, J.; Nüesch, F.; Zhang, C. *Advanced Materials* **2020**, *32*, (17), 2000716.
9. Zhang, C.; McKeon, L.; Kremer, M. P.; Park, S.-H.; Ronan, O.; Seral - Ascaso, A.; Barwich, S.; Coileáin, C. Ó.; McEvoy, N.; Nerl, H. C.; Anasori, B.; Coleman, J. N.; Gogotsi, Y.; Nicolosi, V. *Nature Communications* **2019**, *10*, (1), 1795.
10. Li, Z.; Song, J.; Hu, H.; Yuan, C.; Wu, M.; Ho, D. *Journal of Materials Chemistry A* **2021**, *9*, (5), 2899-2911.
11. Xu, S.; Dall'Agnese, Y.; Wei, G.; Zhang, C.; Gogotsi, Y.; Han, W. *Nano Energy* **2018**, *50*, 479-488.
12. Jiang, Q.; Kurra, N.; Alhabeab, M.; Gogotsi, Y.; Alshareef, H. N. *Advanced Energy Materials* **2018**, *8*, (13), 1703043.
13. Xie, Y.; Zhang, H.; Huang, H.; Wang, Z.; Xu, Z.; Zhao, H.; Wang, Y.; Chen, N.; Yang, W. *Nano Energy* **2020**, *74*, 104928.
14. Qiu, M.; Sun, P.; Cui, G.; Tong, Y.; Mai, W. *ACS Nano* **2019**, *13*, (7), 8246-8255.
